# Supplementary material
Source: publisher site journal article supplement (https://www.dovepress.com/article/456050)
Supplement: Supplementary file 1 [file get_supplementary_file.php]

**Supplementary Table 1 Focus group discussion progress guideline for patients**

| **Step / Topic** | **Question** |
| --- | --- |
| Introduction  (Icebreaking) | 1. Introduction of focus group discussion  - Purpose of focus group discussion - Process guide of focus group discussion   - Notification of recording and confirmation of approval   - Method and precautions of focus group discussion   - Personal information protection |
| 1. Self-introduction  - Demographic information: age, occupation |
| Experience in  patient engagement education | 1. How well do you understand your disease before visiting the hospital?  - Searching questions   - Do you know the medications you are currently taking, your medical history, and your family history?   - How do you mainly check information about your diseases?  1. Have you ever been educated about how and what needs to be done to engage in the treatment process?  - Searching questions   - Who, where, how, and for how long have you been educated?   - What content was the education mainly about? |
| Obstacles to  patient engagement education | 1. Have you ever had difficulty understanding when receiving training from healthcare providers about engagement in the care process?  - Searching questions   - What specific parts of the training were difficult to understand?   - Did you ask your healthcare provider to retrain you on something you didn't understand?  1. Have you ever been denied a request for engagement in the medical process by healthcare providers?  - Searching questions   - What were your feelings at the time?   - What do you think was the reason for the refusal by the healthcare providers? |
| Factors that promote patient engagement education | 1. What type of patient engagement education did you find helpful in understanding the care process?  - Searching questions   - What is the specific reason?   - What factors do you consider important in education (educator's occupation, friendliness of educators, teaching methods, etc.)?  1. What kind of preparation do you think is needed to educate the public on patient engagement?  - Searching questions   - Which occupations would you like to provide training for?   - How would you like to educate yourself?   - Do you think education for caregivers other than patients is also necessary? If so, to what extent do you think carers should be involved in education?   - What do you think patients need to prepare themselves? |
| Finish the discussions | 1. Let’s summarize some of the key points from our discussion. Is there anything else? 2. Do you have any additional comments or questions? |

**Supplementary Table 2 Focus group discussion progress guideline for physicians and nurses**

| **Step / Topic** | **Question** |
| --- | --- |
| Introduction  (Icebreaking) | 1. Introduction of focus group discussion  - Purpose of focus group discussion - Process guide of focus group discussion   - Notification of recording and confirmation of approval   - Method and precautions of focus group discussion   - Personal information protection |
| 1. Self-introduction  - Demographic information: age, occupation |
| Experience in  patient engagement education | 1. Do you have any experience in encouraging patient engagement during the treatment process?  - Searching questions   - Was patient engagement achieved through the efforts of the healthcare providers or at the request of the patient?   - Approximately how much of your working hours do you spend face-to-face communicating with patients?  1. Are there educational materials to encourage patient engagement within the institution?  - Searching questions   - Who developed the provided educational materials?   - If there are educational materials, who, where, how much, and how (educators, training places, training hours, training methods) are using them?   - Are educational materials used frequently? |
| Obstacles to  patient engagement education | 1. What part of education do you find the most difficult to induce patient engagement?  - Searching questions   - Have you ever been interrupted during training to lead patient engagement?   - What factors do you think to make patient engagement education the most difficult? (overload of work, deterioration of patients' health literacy, lack of appropriate educational materials, etc.) |
| Factors that promote patient engagement education | 1. What factors helped in training to engage patients?  - Searching questions   - What are the patient preferences for education?   - In which occupational group does patients feel most satisfied with their education?   - With which caregiver do patients prefer to be educated? Or does the patient want to be educated on his/her own?  1. What do you think is the most necessary when developing a patient engagement education plan for the public?  - Searching questions   - Which occupation do you think is the most effective for educators?   - What kind of training place and time do you think is appropriate?   - Which method do you think is the most effective for teaching methods? |
| Finish the discussions | 1. Let’s summarize some of the key points from our discussion. Is there anything else? 2. Do you have any additional comments or questions? |
